# Supplementary material for: Efficacy of Pilates on Pain, Functional Disorders and Quality of Life in Patients with Chronic Low Back Pain: A Systematic Review and Meta-Analysis
Source: MDPI journal article supplement (doi:10.3390/ijerph20042850), 2023-02-06
Supplement: s1 [file s1]

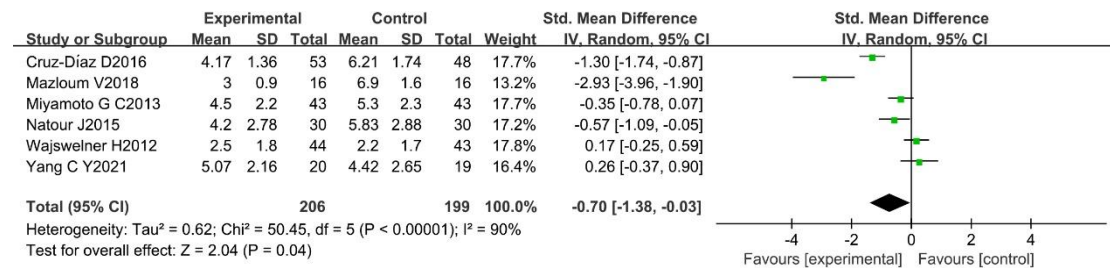

**Supplementary Figure S1.** Meta-analysis of the effect of Pilates on Pain Scale follow-up.

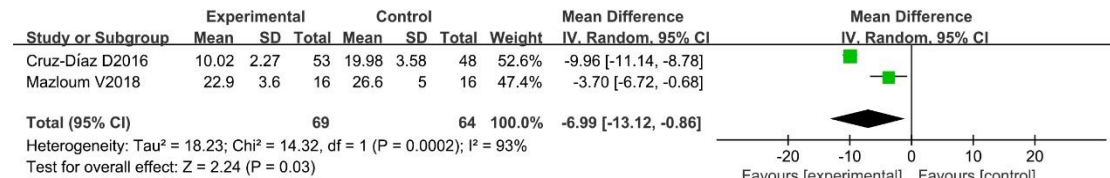

**Supplementary Figure S2.** Meta-analysis of the effect of Pilates on ODI follow-up.

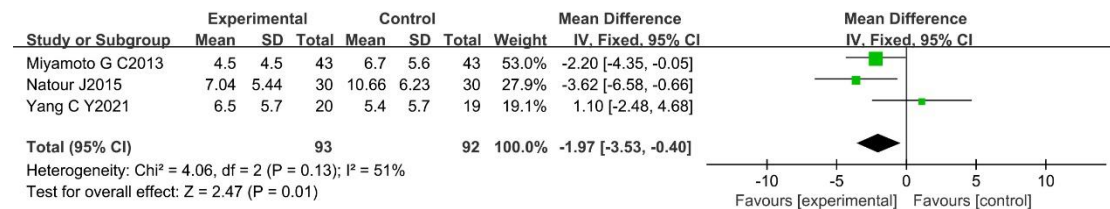

**Supplementary Figure S3.** Meta-analysis of the effect of Pilates on RMDQ follow-up.

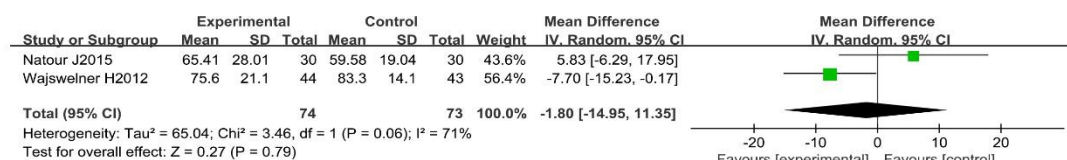

## A-Physical Function

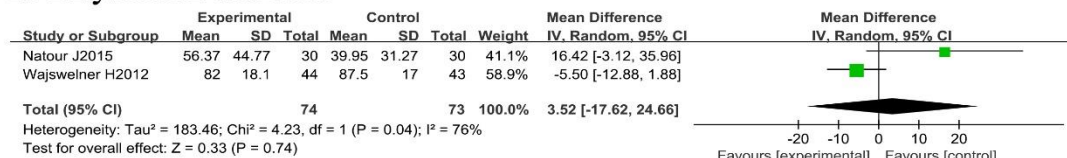

## B-Role Physical

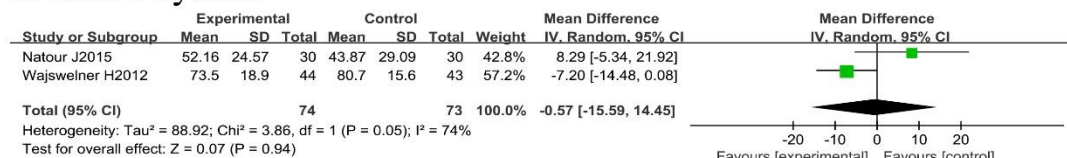

## C-Bodily Pain

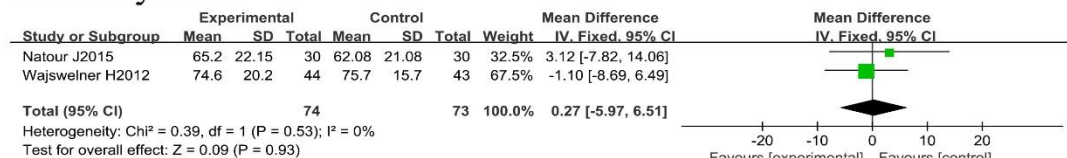

## D-General Health

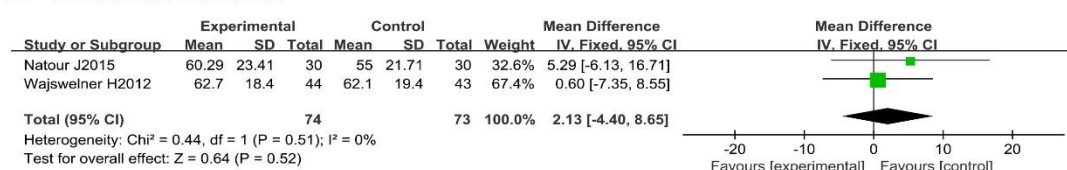

## E-Vitality

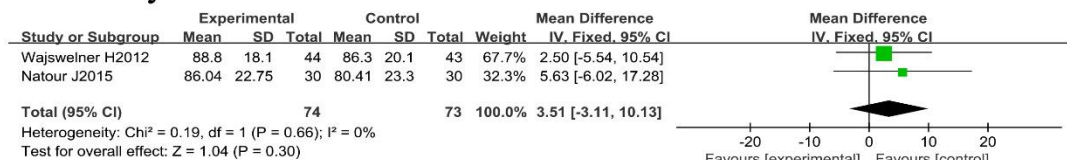

## F-Social Functioning

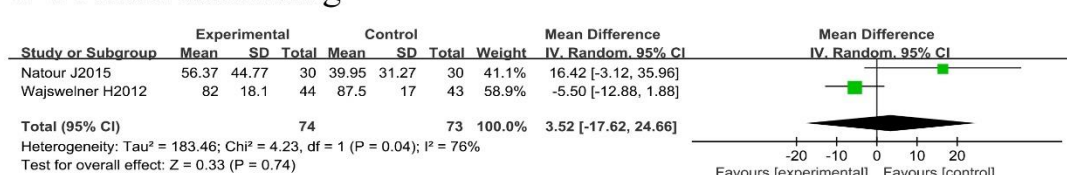

## G-Role Emotion

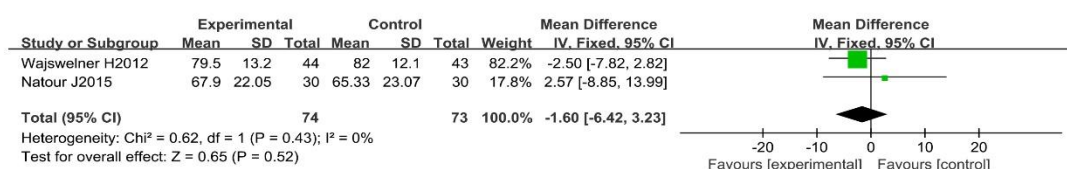

## H-Mental Health

Supplementary Figure S4. Meta-analysis of the effect of Pilates on SF-36 follow-up.

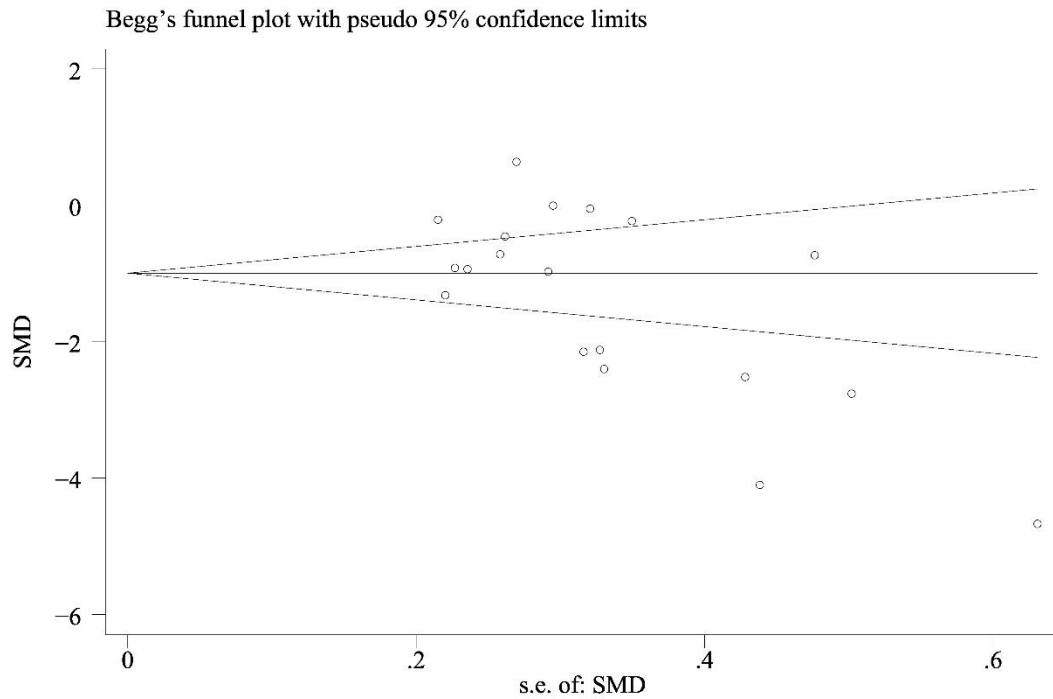

**Supplementary Figure S5.** Pain Scale publication bias graph of the included RCTs.

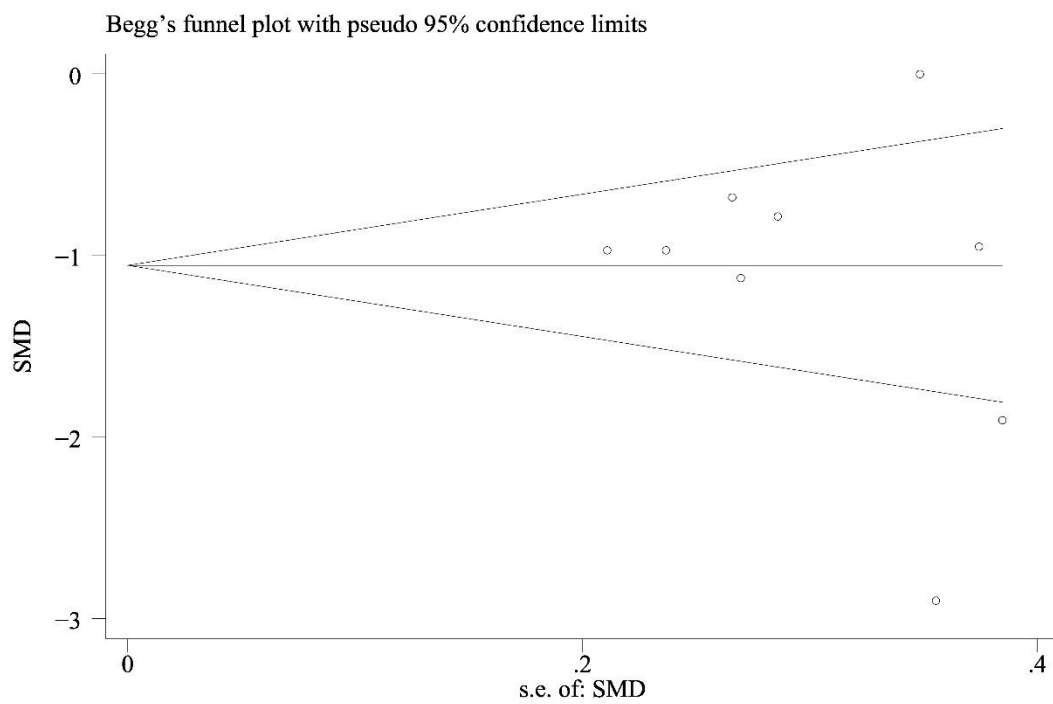

**Supplementary Figure S6.** ODI publication bias graph of the included RCTs.

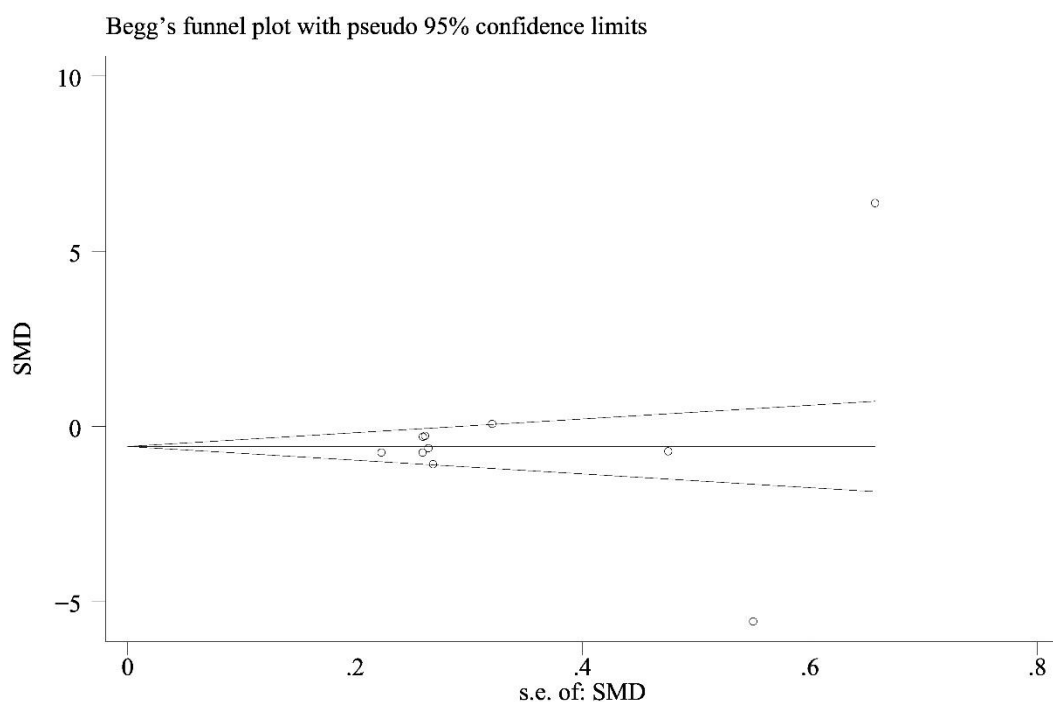

**Supplementary Figure S7.** RMDQ publication bias graph of the included RCTs.

**Supplementary Table S1.** Search strategy for each database.

| Search engine | Search | Search query                                                                                                                                                | Date of search |
|---------------|--------|-------------------------------------------------------------------------------------------------------------------------------------------------------------|----------------|
| CNKI/VIP/CBM  | #1     | 主题 (Topic) =普拉提(Pilates) OR 普拉提训练(Pilates training)                                                                                                         | 20-November-22 |
|               | #2     | 主题 (Topic) =腰痛(back pain/ low back pain) OR 非特异性腰痛(nonspecific low back pain) OR 慢性腰痛(chronic low back pain) OR 慢性非特异性腰痛(chronic nonspecific low back pain) |                |
|               | #3     | #1 AND #2                                                                                                                                                   |                |
| PubMed        | #1     | Pilates [Title/Abstract]                                                                                                                                    | 20-November-22 |
|               | #2     | Pilates training [Title/Abstract]                                                                                                                           |                |
|               | #3     | #1 OR #2                                                                                                                                                    |                |
|               | #4     | low back pain [Title/Abstract]                                                                                                                              |                |
|               | #5     | back pain [Title/Abstract]                                                                                                                                  |                |
|               | #6     | low back ache [Title/Abstract]                                                                                                                              |                |
|               | #7     | chronic low back pain [Title/Abstract]                                                                                                                      |                |
|               | #8     | nonspecific low back pain[Title/Abstract]                                                                                                                   |                |
|               | #9     | chronic nonspecific low back pain [Title/Abstract]                                                                                                          |                |

|                   |     |                                                                                                                                                                                                                                                                                                                                                                          |                |
|-------------------|-----|--------------------------------------------------------------------------------------------------------------------------------------------------------------------------------------------------------------------------------------------------------------------------------------------------------------------------------------------------------------------------|----------------|
|                   | #10 | chronic nonspecific lumbago<br>[Title/Abstract]                                                                                                                                                                                                                                                                                                                          |                |
|                   | #11 | chronic nonspecific lower back<br>pain [Title/Abstract]                                                                                                                                                                                                                                                                                                                  |                |
|                   | #12 | chronic nonspecific lumbar<br>pain[Title/Abstract]                                                                                                                                                                                                                                                                                                                       |                |
|                   | #13 | non-specific lower back pain<br>[Title/Abstract]                                                                                                                                                                                                                                                                                                                         |                |
|                   | #14 | #4 OR #5 OR #6 OR #7 OR #8 OR #9<br>OR #10 OR #11 OR #12 OR #13                                                                                                                                                                                                                                                                                                          |                |
|                   | #15 | #3 AND #14                                                                                                                                                                                                                                                                                                                                                               |                |
| Web of<br>Science | #1  | TS = ('Pilates' OR 'Pilates training')                                                                                                                                                                                                                                                                                                                                   | 20-November-22 |
|                   | #2  | TS = ('low back pain' OR 'back<br>pain' OR 'low back ache' OR<br>'chronic low back pain' OR<br>'nonspecific low back pain ' OR<br>'nonspecific low back pain' OR<br>'chronic nonspecific low back pain'<br>OR 'chronic nonspecific lumbago'<br>OR 'chronic nonspecific lower back<br>pain' OR 'chronic nonspecific<br>lumbar pain' OR 'non-specific<br>lower back pain') |                |
|                   | #3  | #1 AND #2<br>Databases = SCI-EXPANDED,<br>SSCI, A&HCI, CPCI-S, CPCI-SSH,<br>ESCI                                                                                                                                                                                                                                                                                         |                |
| Embase            | #1  | 'Pilates' OR 'Pilates training'                                                                                                                                                                                                                                                                                                                                          | 20-November-22 |
|                   | #2  | 'low back pain' OR 'back pain' OR<br>'low back ache' OR 'chronic low<br>back pain' OR 'nonspecific low<br>back pain ' OR 'nonspecific low<br>back pain' OR 'chronic nonspecific<br>low back pain' OR 'chronic<br>nonspecific lumbago' OR 'chronic<br>nonspecific lower back pain' OR<br>'chronic nonspecific lumbar pain'<br>OR 'non-specific lower back pain'           |                |
|                   | #3  | #1 AND #2                                                                                                                                                                                                                                                                                                                                                                |                |
| EBSCO             | S1  | Pilates OR Pilates training                                                                                                                                                                                                                                                                                                                                              | 20-November-22 |
|                   | S2  | low back pain OR back pain OR<br>low back ache OR chronic low back<br>pain OR nonspecific low back pain<br>OR nonspecific low back pain OR<br>chronic nonspecific low back pain<br>OR chronic nonspecific lumbago<br>OR chronic nonspecific lower back<br>pain OR chronic nonspecific<br>lumbar pain OR non-specific lower<br>back pain                                  |                |
|                   | S3  | S1 AND S2                                                                                                                                                                                                                                                                                                                                                                |                |

**Supplementary Table S2.** Jadad scale score of included RCTs.

| Reference          | Generation of random sequences | Randomization concealment | Blind method | Withdrawal | Total score | Level |
|--------------------|--------------------------------|---------------------------|--------------|------------|-------------|-------|
| Gladwell V.2005    | 1                              | 0                         | 2            | 1          | 4           | H     |
| Rydeard R.2006     | 2                              | 1                         | 0            | 1          | 4           | H     |
| Wajswelner H.2012  | 2                              | 2                         | 2            | 1          | 7           | H     |
| Miyamoto G C.2013  | 2                              | 2                         | 2            | 1          | 7           | H     |
| Notarnicola A.2014 | 0                              | 0                         | 0            | 1          | 1           | L     |
| Mostagi F Q.2015   | 2                              | 2                         | 2            | 1          | 7           | H     |
| Natour J.2015      | 2                              | 2                         | 2            | 1          | 7           | H     |
| Akodu A.2016       | 1                              | 0                         | 2            | 0          | 3           | L     |
| Cruz-Díaz D.2016   | 2                              | 2                         | 2            | 1          | 7           | H     |
| Cruz-Díaz D.2017   | 2                              | 1                         | 2            | 1          | 6           | H     |
| Lopes S.2017       | 2                              | 1                         | 1            | 1          | 5           | H     |
| Mazloun V.2018     | 1                              | 0                         | 2            | 1          | 4           | H     |
| Ying Z.2019        | 2                              | 1                         | 0            | 1          | 4           | H     |
| Minghui L.2019     | 1                              | 1                         | 0            | 1          | 3           | L     |
| Baskan Ö.2021      | 2                              | 1                         | 2            | 1          | 6           | H     |
| Batibay S.2021     | 1                              | 1                         | 2            | 0          | 4           | H     |
| Yang C.2021        | 2                              | 1                         | 2            | 2          | 6           | H     |
| Fei W.2022         | 1                              | 1                         | 0            | 1          | 3           | L     |
| Manman M.2022      | 1                              | 1                         | 0            | 1          | 3           | L     |

Table notes: The numbers are the scores of each item. The higher the score, the higher the quality. “Total score” represents the sum of the scores of each item. “H” means high quality. “L” means low quality.

**Supplementary Table S3.** The pooled results of sensitivity analyses [MD (95% CI)].

| Indicators | Minimum estimate       | Maximum estimate       | Overall result         |
|------------|------------------------|------------------------|------------------------|
| Pain Scale | -1.412(-1.922, -0.903) | -1.272(-1.772, -0.772) | -1.336(-1.829, -0.842) |
| ODI        | -1.250(-1.691, -0.810) | -0.913(-1.207, -0.619) | -1.124(-1.572, -0.675) |
| RMDQ       | -1.013(-1.659, -0.366) | 0.073(-0.674, 0.821)   | -0.405(-1.311, 0.502)  |
